# Supplementary material for: Dimethyl carbonate and switchable anionic surfactants: two effective tools for the extraction of polyhydroxyalkanoates from microbial biomass
Source: Royal Society of Chemistry journal article supplement (doi:10.1039/c4gc01821d), 2014-10-24
Supplement: c4gc01821d1.pdf [file c4gc01821d1.pdf]

## Dimethyl carbonate and Switchable Anionic Surfactants: two effective tools for the extraction of polyhydroxyalkanoates from microbial biomass

Chiara Samorì,\* Marina Basaglia, Sergio Casella, Lorenzo Favaro, Paola Galletti, Loris Giorgini, Davide Marchi, Laura Mazzocchetti, Cristian Torri, Emilio Tagliavini.

**Table 1.** PHA yield (wt%, calculated gravimetrically on microbial biomass weight basis) and recovery (%), calculated as  $\frac{\text{PHA yield} * \text{PHA purity}}{\text{PHA amount in the microbial cells}}$  obtained under various conditions.

| Treatment                        | Biomass source                  | PHA type      | Temperature (°C) | Time (h) | PHA yield (wt%) | PHA recovery (%) |
|----------------------------------|---------------------------------|---------------|------------------|----------|-----------------|------------------|
| CH <sub>2</sub> Cl <sub>2</sub>  | Freeze dried                    | P(3HB)        | 50               | 4        | 73±1            | 98±3             |
| DMC                              | Freeze dried                    | P(3HB)        | 90               | 1        | 64±2            | 87±2             |
| DMC                              | Freeze dried                    | P(3HB)        | 90               | 2        | 64±3            | 86±4             |
| DMC                              | Freeze dried                    | P(3HB)        | 90               | 3        | 63±3            | 85±4             |
| DMC                              | Freeze dried                    | P(3HB)        | 90               | 4        | 65±4            | 88±6             |
| DMC                              | Freeze dried                    | P(3HB)        | 50               | 4        | 8±1             | 11±1             |
| DEC                              | Freeze dried                    | P(3HB)        | 90               | 4        | 4±1             | 6±1              |
| PC                               | Freeze dried                    | P(3HB)        | 90               | 4        | 3±0.2           | 4±1              |
| PC                               | Freeze dried                    | P(3HB)        | 140              | 4        | 70±6            | 95±8             |
| AcOEt                            | Freeze dried                    | P(3HB)        | 80               | 4        | 3±1             | 5±1              |
| DMC                              | Slurry (50 g L <sup>-1</sup> )  | P(3HB)        | 90               | 1        | 62±5            | 85±6             |
| DMC                              | Slurry (50 g L <sup>-1</sup> )  | P(3HB)        | 90               | 2        | 64±2            | 86±3             |
| DMC                              | Slurry (50 g L <sup>-1</sup> )  | P(3HB)        | 90               | 3        | 70±3            | 94±4             |
| DMC                              | Slurry (50 g L <sup>-1</sup> )  | P(3HB)        | 90               | 4        | 69±2            | 93±3             |
| DMC                              | Slurry (100 g L <sup>-1</sup> ) | P(3HB)        | 90               | 1        | 68±4            | 92±6             |
| DEC                              | Slurry (50 g L <sup>-1</sup> )  | P(3HB)        | 90               | 1        | 13±4            | 17±5             |
| AcOEt                            | Slurry (50 g L <sup>-1</sup> )  | P(3HB)        | 80               | 1        | 3±1             | 4±0.1            |
| DMC                              | Freeze dried                    | P(3HB-co-3HV) | 90               | 1        | 46±3            | 84±5             |
| DMC                              | Slurry (50 g L <sup>-1</sup> )  | P(3HB-co-3HV) | 90               | 1        | 47±1            | 87±1             |
| DMC                              | Freeze dried                    | P(3HB-co-4HB) | 90               | 1        | 56±1            | 88±1             |
| DMC                              | Slurry (50 g L <sup>-1</sup> )  | P(3HB-co-4HB) | 90               | 1        | 61±5            | 95±8             |
| NH <sub>4</sub> -laurate 200 wt% | Slurry (17 g L <sup>-1</sup> )  | P(3HB)        | 90               | 3        | 77±3            | 102±6            |
| NH <sub>4</sub> -laurate 100 wt% | Slurry (25 g L <sup>-1</sup> )  | P(3HB)        | 90               | 3        | 78±3            | 84±3             |
| NH <sub>4</sub> -laurate 50 wt%  | Slurry (50 g L <sup>-1</sup> )  | P(3HB)        | 90               | 3        | 76±3            | 93±14            |
| NH <sub>4</sub> -laurate 20 wt%  | Slurry (100 g L <sup>-1</sup> ) | P(3HB)        | 90               | 3        | 79±1            | 86±8             |
| NH <sub>4</sub> OH (0.1 N)       | Slurry (17 g L <sup>-1</sup> )  | P(3HB)        | 90               | 3        | 79±2            | 74±15            |
| SDS 200wt%                       | Slurry (17 g L <sup>-1</sup> )  | P(3HB)        | 90               | 3        | 75±1            | 100±2            |

**FT-IR analysis.** A Thermo Nicolet (Thermo Fisher Scientific, Waltham, MA, USA), Avatar 370 was used. The measurements were performed in transmission mode in the range 4.000-400  $\text{cm}^{-1}$ , at a spectral resolution of 4  $\text{cm}^{-1}$ , by using KBr. A dedicated software, OMNIC™ (Thermo Fisher Scientific, Waltham, MA, USA), was applied for the manipulation of the spectra.

**Figure 1.** FT-IR spectra of various P(3HB) achieved with DMC-extraction of microbial slurry,  $\text{NH}_4$ -laurate (200 wt%) and  $\text{NH}_4\text{OH}$  (0.1N) dissolution of NPCM, in comparison with commercial P(3HB)

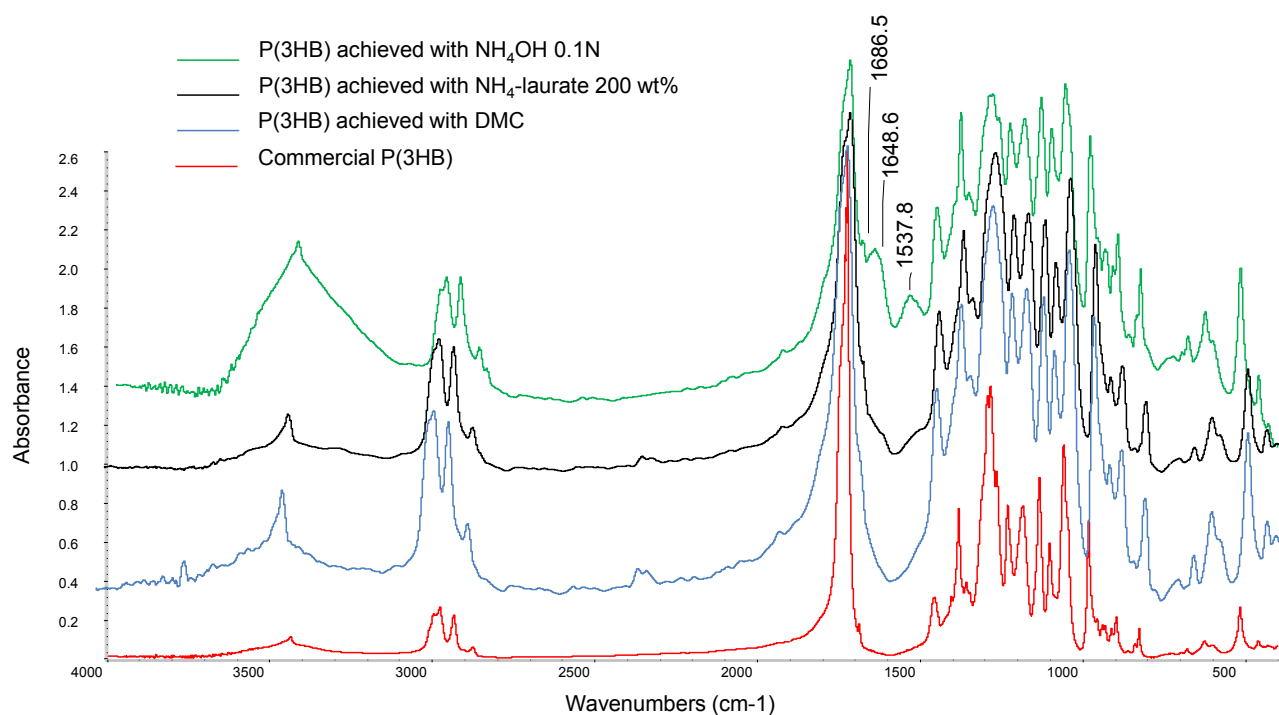

**Table 2.** Bacterial, yeast and fungal strains screened in this study for their ability to use DMC as carbon source, and related defined media.

| Strain                                     | Trait of interest      | Medium             | Reference or Source |
|--------------------------------------------|------------------------|--------------------|---------------------|
| <i>C. necator</i> DSM 545                  | PHA-producer           | DSMZ81             | DSMZ                |
| <i>Delftia acidovorans</i> DSM 39          | PHA-producer           | DSMZ81             | DSMZ                |
| <i>Hydrogenophaga pseudoflava</i> DSM 1034 | PHA-producer           | Minimal medium [1] | DSMZ                |
| <i>Pseudomonas</i> sp. DSM 1749            | PHA-producer           | DSMZ81             | DSMZ                |
| <i>Bacillus farraginis</i> LF3             | $\text{H}_2$ -producer | DSMZ81             | [2]                 |
| <i>Brevibacillus</i> sp LF12               | $\text{H}_2$ -producer | DSMZ81             | [2]                 |
| <i>Paenibacillus</i> sp LF82               | $\text{H}_2$ -producer | DSMZ81             | [2]                 |
| <i>Enterococcus faecium</i> ST209GB        | Bacteriocins-producer  | M9                 | [3]                 |
| <i>E. faecium</i> ST711GB                  | Bacteriocins-producer  | M9                 | [3]                 |
| <i>Candida glabrata</i> LF83               | Wine yeast strain      | YNB (Yeast)        | Dafnae Department   |

|                                              |                                 |                                                |                                                                       |
|----------------------------------------------|---------------------------------|------------------------------------------------|-----------------------------------------------------------------------|
| <i>Issatchenkia orientalis</i> LF15          | Wine yeast strain               | Nitrogen Base)<br>YNB (Yeast<br>Nitrogen Base) | (University of Padova)<br>Dafnae Department<br>(University of Padova) |
| <i>Hanseniaspora uvarum</i> LF4              | Wine yeast strain               | YNB (Yeast<br>Nitrogen Base)                   | Dafnae Department<br>(University of Padova)                           |
| <i>Saccharomyces cerevisiae</i> 27P          | Industrial bioethanol<br>strain | YNB (Yeast<br>Nitrogen Base)                   | [4]                                                                   |
| <i>S. cerevisiae</i> Fm17                    | Industrial bioethanol<br>strain | YNB (Yeast<br>Nitrogen Base)                   | [5]                                                                   |
| <i>S. cerevisiae</i> DSM 70049               | Ethanol producer                | YNB (Yeast<br>Nitrogen Base)                   | DSMZ                                                                  |
| <i>Saccharomycodes ludwigii</i><br>DSM 70551 | Ethanol producer                | YNB (Yeast<br>Nitrogen Base)                   | DSMZ                                                                  |
| <i>Biscognauxia mediterranea</i>             | Enzymes-producer                | Minimal medium<br>[6]                          | TESAF department<br>(University of Padova)                            |
| <i>Pleurotus ostreatus</i>                   | Enzymes-producer                | Minimal medium<br>[6]                          | TESAF department<br>(University of Padova)                            |
| <i>Schizzophilium comune</i>                 | Enzymes-producer                | Minimal medium<br>[6]                          | TESAF department<br>(University of Padova)                            |
| <i>Trametes versicolor</i>                   | Enzymes-producer                | Minimal medium<br>[6]                          | TESAF department<br>(University of Padova)                            |
| <i>Lepiota procera</i>                       | Enzymes-producer                | Minimal medium<br>[6]                          | TESAF department<br>(University of Padova)                            |
| <i>Ganoderma appianatum</i>                  | Enzymes-producer                | Minimal medium<br>[6]                          | TESAF department<br>(University of Padova)                            |

- [1] M. G. Romanelli, S. Povolo, L. Favaro, F. Fontana, M. Basaglia, S. Casella, *Int. J. Biol. Macromol.* <http://dx.doi.org/10.1016/j.ijbiomac.2014.03.049>
- [2] A. Alibardi, L. Favaro, M.C. Lavagnolo, M. Basaglia, S. Casella, *Water Sci. Technol.*, 2012, **66**, 1483-1490
- [3] L. Favaro, M. Basaglia, S. Casella, I. Hue, X. Dousset, B.D. Gombossy de Melo Franco, S.D. Todorov, *Food Microbiol.*, 2014, **38**, 228-239
- [4] L. Favaro, T. Jooste, M. Basaglia, S.H. Rose, M. Saayman, J.F. Görgens, S. Casella, W.H. van Zyl, *Appl. Microbiol. Biotechnol.*, 2012, **95**, 957-968
- [5] L. Favaro, M. Basaglia, A. Trento, E. van Rensburg, M. García-Aparicio, W.H. van Zyl, S. Casella, *Biotechnol. Biofuels*, 2013, **6**, 168
- [6] T.J. Leonard, *J. Bacteriol.*, 1971, **106**, 162-167
